# Supplementary material
Source: PubMed Central journal article supplement (PMC4662601)
Supplement: NIHMS730918-supplement-1.pdf [file NIHMS730918-supplement-1.pdf]

## **Inventory of Supplemental information**

### **Supplemental Figures**

- Figure S1: Identification of a major Pin1-binding protein as CRMP2 by LC-MS/MS. Related to Figure 1
- Figure S2: Knockdown of Pin1 or CRMP2A leads to reduction of total CRMP2 level in the vicinity of growth cones. Related to Figure 3
- Figure S3: Inhibition of Pin1 isomerase activity reduces axon growth and CRMP2A axon levels in primary cortical neurons. Overexpressed FLAG-tagged CRMP2A accumulates in distal axons. Related to Figure 4
- Figure S4: Pin1 KO does not increase sensitivity to LPA treatment. Related to Figure 5
- Figure S5: Alvear pathway of the entorhino-hippocampal projections at E15.5 Pin1 KO embryos and fasciculation of somatosensory (S1) axons at midline of corpus callosum in adult Pin1 KO mice. Related to Figure 6

### **Supplemental Figures legends**

### **Experimental Procedures**

### **References**
